# Supplementary material for: Detecting Parkinson’s Disease through Gait Measures Using Machine Learning
Source: MDPI journal article supplement (doi:10.3390/diagnostics12102404), 2022-10-03
Supplement: s1 [file s1]

Supplementary Table S1. Optimal parameters in logistic regression.

|                   | $\theta$                                                                                                                                                                                               |
|-------------------|--------------------------------------------------------------------------------------------------------------------------------------------------------------------------------------------------------|
| Baseline Model    | [[ 0.36227728 -0.27684577 0.36249594 -0.74959155 -2.36317558 -0.75735135<br>-1.28505679 -0.10837418 0.88861374 0.27256738 -0.28493439 -0.31584704<br>-0.84170895 -0.35456641 -1.20428701 -1.96159754]] |
| Sides Only        | [[ -0.09955193 0.29582405 -0.76386797 -2.6487509 -0.4904947 -1.53701646<br>0.17724857 0.19234567 -0.44792463 -1.04132151 -0.32247221 -1.67261833]]                                                     |
| Exclude Diagonals | [[ 0.34938102 -0.99699448 -2.58392103 -0.93272661 0.65799691 -0.35733629<br>-0.84651138 -2.78785022]]                                                                                                  |

Supplementary Table S2. Performance metrics in the training process.

|                  |     | Accuracy<br>Mean (SD)<br>n=10 | Precision<br>Mean (SD)<br>n=10 | Recall<br>Mean (SD)<br>n=10 | False Positive Rate<br>Mean (SD)<br>n=10 |
|------------------|-----|-------------------------------|--------------------------------|-----------------------------|------------------------------------------|
| Baseline model   | LR  | 0.82 (0.01)                   | 0.82 (0.01)                    | 0.95 (0.01)                 | 0.50 (0.03)                              |
|                  | SVM | 1.00 (0.00)                   | 1.00 (0.00)                    | 1.00 (0.00)                 | 0.01 (0.01)                              |
| Frequency domain | LR  | 1.00 (0.002)                  | 1.00 (0.004)                   | 1.00 (0.003)                | 0.01 (0.01)                              |
|                  | SVM | 0.99 (0.00)                   | 0.99 (0.01)                    | 1.00 (0.00)                 | 0.02 (0.01)                              |
| DT               |     | 1.00 (0.002)                  | 1.00 (0.00)                    | 1.00 (0.003)                | 0.00 (0.00)                              |
| KNN              |     | 1.00 (0.002)                  | 1.00 (0.00)                    | 1.00 (0.003)                | 0.00 (0.00)                              |
